# Supplementary material
Source: MDPI journal article supplement (https://www.mdpi.com/2076-3298/10/11/190)
Supplement: s1 [file s1]

**Title:**

**A Comparative study of heavy metal pollution in ambient air and the health risks assessment in industrial, urban and semi-urban areas of West Bengal, India: An Evaluation of carcinogenic, non-carcinogenic, and additional lifetime cancer cases**

**Buddhadev Ghosh<sup>1</sup>, Pratap Kumar Padhy<sup>1\*</sup>, Soumya Niyogi<sup>2,3</sup>, Pulak Kumar Patra<sup>1</sup>, and Markus Hecker<sup>3,4</sup>**

<sup>1</sup>Department of Environmental Studies, Visva-Bharati, Santiniketan, West Bengal, India

<sup>2</sup>Department of Biology, University of Saskatchewan, Saskatoon, SK, Canada

<sup>3</sup>Toxicology Centre, University of Saskatchewan, Saskatoon, SK, Canada

<sup>4</sup>School of Environment and Sustainability, University of Saskatchewan, Saskatoon, SK, Canada

**\*Corresponding Author:**

**Prof. Pratap Kumar Padhy,**

Department of Environmental Studies, Siksha Bhavana (Institute of Science), Visva-Bharati, Santiniketan, Birbhum, West Bengal, India, PIN- 731 235

Email: [pkpadhy@visva-bharati.ac.in](mailto:pkpadhy@visva-bharati.ac.in)

Telephone no: +91 8250364428 (M)

Table S1. Component loadings of principal component analysis (PCA) in Bolpur (sampling time December 2021 to June 2022)

| <b>Metal</b>    | <b>PC1</b> | <b>PC2</b> | <b>PC3</b> | <b>Uniqueness</b> |
|-----------------|------------|------------|------------|-------------------|
| Ni              | 0.957      |            |            | 0.075             |
| Cr              | 0.876      | -0.433     |            | 0.013             |
| Pb              | -0.799     |            | 0.495      | 0.090             |
| Mn              | 0.767      |            | 0.558      | 0.090             |
| Cd              |            | 0.852      |            | 0.137             |
| As              |            | 0.832      |            | 0.147             |
| Eigenvalue      | 3.020      | 1.648      | 0.780      |                   |
| Proportion var. | 0.503      | 0.275      | 0.130      |                   |

var. = Variance

Table S2. Component loadings of principal component analysis (PCA) in Durgapur (sampling time December 2021 to June 2022)

| <b>Metal</b>    | <b>PC1</b> | <b>PC2</b> | <b>PC3</b> | <b>Uniqueness</b> |
|-----------------|------------|------------|------------|-------------------|
| Cr              | 0.995      |            |            | 0.000             |
| Ni              | 0.979      |            |            | 0.007             |
| Pb              | 0.964      |            |            | 0.000             |
| As              | 0.937      |            |            | 0.001             |
| Mn              | 0.935      |            |            | 0.017             |
| Cd              |            | 0.994      |            | 0.002             |
| Eigenvalue      | 4.640      | 1.182      | 0.149      |                   |
| Proportion var. | 0.773      | 0.197      | 0.025      |                   |

Table S3. Component loadings of principal component analysis (PCA) in Kolkata (sampling time December 2021 to June 2022)

| <b>Metal</b>    | <b>PC1</b> | <b>PC2</b> | <b>PC3</b> | <b>Uniqueness</b> |
|-----------------|------------|------------|------------|-------------------|
| Cd              | 0.945      |            |            | 0.011             |
| As              | 0.923      |            |            | 0.045             |
| Pb              | 0.884      |            |            | 0.066             |
| Ni              | 0.798      |            |            | 0.257             |
| Cr              | -0.748     |            | 0.542      | 0.053             |
| Mn              |            | 0.881      |            | 0.031             |
| Eigenvalue      | 3.826      | 1.213      | 0.498      |                   |
| Proportion var. | 0.638      | 0.202      | 0.083      |                   |
